# Supplementary material for: The dual delivery of growth factors and antimicrobial peptide by PLGA/GO composite biofilms to promote skin-wound healing
Source: Royal Society of Chemistry journal article supplement (doi:10.1039/c9nj05389a), 2019-12-23
Supplement: c9nj05389a1.pdf [file c9nj05389a1.pdf]

1 **Support information for**

2 **The dual delivery of growth factors and antimicrobial peptide**

3 **by PLGA/GO composite biofilms to promote skin wound**

4 **healing**

5 Ziyang Zhang<sup>1</sup>, Shicheng Zhou<sup>1</sup>, Yanzhe Zhang<sup>1</sup>, Dankai Wu<sup>1\*</sup>, Xiaoyu Yang<sup>1\*</sup>

6 <sup>1</sup> Department of Orthopedic Surgery, the Second Hospital of Jilin University, Ziqiang

7 Street No. 218, Changchun TX: 130041, PR China

8 Current Address: Department of Orthopedic Surgery, the Second Hospital of Jilin

9 University, Ziqiang Street No. 218, Changchun TX: 130041, PR China

10 \*Corresponding Author

11 E-mail:wudankai@126.com(WDK);

12 E-mail:yangxiaoy@jlu.edu.cn (YXY);

# 1 Supplementary Figures

2 **Fig. S1** SEM images of PLGA and PLGA/GO composite biofilms cross-section. Bar

3 lengths are 50  $\mu$  m.

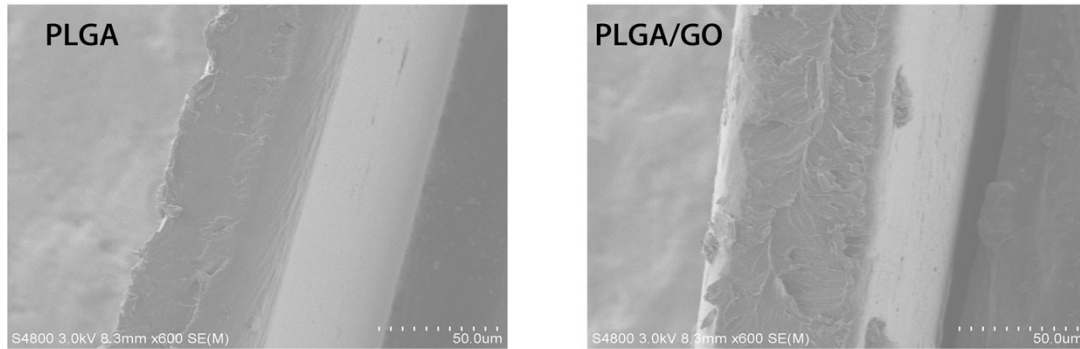

4

5 **Fig. S2** AFM images of the surface of PLGA and PLGA/GO composite biofilms.

6 The scale for AFM is 5  $\mu$  m  $\times$  5  $\mu$  m.

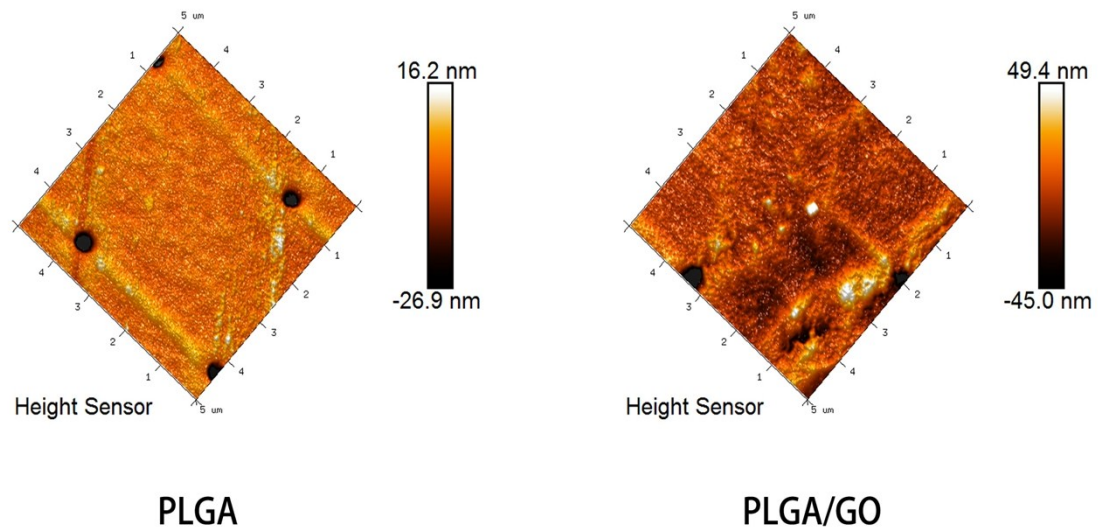

7

8

9

10

11

## 1 **Supplementary Methods**

### 2 **SEM images of different composite biofilms cross-section**

3 Different composite biofilms were cut into square pieces and placed onto an  
4 aluminum stub pasted with a conducting carbon tape. An ion sputter coating machine  
5 was used to coat gold over the sample for 60 s at 20 mA. Samples fixed on the holder  
6 were inserted into a scanning electron microscope (ESEM, XL30 FEG, Philips)  
7 chamber followed by the evacuation of chamber cavity. The cross-section of different  
8 composite biofilms was observed at various locations and recorded. The thickness of  
9 composite biofilms cross-section was calculated by measuring at least 4 samples  
10 using the ImageJ software.

### 11 **AFM images of PLGA and PLGA/GO composite biofilms**

12 For multimode scanning probe atomic force microscope (AFM) (N8 NEOSTM,  
13 Bruker Nano-GmbH, Germany) analysis, we used the oscillation mode of a  
14 Tap190Al-G (budget sensors) probe with a resonance frequency of 180 kHz and a tip  
15 radius under 10 nm.
